# Supplementary material for: A Simple and Non-destructive Method for Chlorophyll Quantification of Chlamydomonas Cultures Using Digital Image Analysis
Source: Front Bioeng Biotechnol. 2020 Jul 21;8:746. doi: 10.3389/fbioe.2020.00746 (PMC7386287; doi:10.3389/fbioe.2020.00746)
Supplement: Supplementary file 2 [file Data_Sheet_1.xlsx]

## Sheet: Control (Sterile)
Note: SD(green) in each case is the SD of final GPI between three digital photographs taken combined with the SD of the TAP-Biomass baseline assuming V(A+B)=V(A)+V(B)
Sample Name	Green Pixel Saturation (a.u.)	SD (green)	Chl a+b (µg/ml)	SD (Chl a +b)	Chl a (µg/ml)	SD (Chl a)	Chl b (µg/ml)	SD (Chl b)	%RSD (GPI)	%RSD (Chla+b)	%RSD (Chla)	%RSD (Chlb)			Chla+b	Chla	Chlb
24/11/17 9	0.18193	0.00582	34.4631	0.87907	23.9744	0.771	10.4887	0.1091	3.19903	2.55076	3.21593	1.04017	Orange Points in Figure 3 - i.e. outside of linear range	Limit of Blank (µg/ml)	0.04609	0.05547	0.0648
24/11/17 11	0.17227	0.00481	30.593	0.18375	21.55	0.2063	9.043	0.13286	2.79213	0.600628	0.957309	1.4692		Limit of Detection (µg/ml)	0.121908	0.10482	0.08125
20/11/17 2	0.16047	0.000596113	19.3069	0.34063	13.6804	0.22806	5.62653	0.113	0.371479	1.76429	1.66706	2.00834		Higher limit of linear interval (µg/ml)	16	16	16
20/11/17 1	0.15925	0.00156	18.2358	0.31413	12.8585	0.23765	5.37729	0.09373	0.979592	1.7226	1.84819	1.74307		Average %RSD for linear interval	5.75132	4.74472	4.97852
21/05/2018 2	0.15109	0.00171	24.4037	0.8578	17.6049	0.60662	6.79882	0.25305	1.13178	3.51504	3.44574	3.72197
21/05/2018 1	0.1492	0.00483	25.2526	0.42903	17.9487	0.25698	7.30397	0.21958	3.23727	1.69895	1.43175	3.00631
21/05/2018 3	0.14017	0.0017	23.8019	0.17011	17.137	0.11	6.6649	0.07867	1.21281	0.714691	0.641886	1.18036
21/05/2018 6	0.13717	0.00236	21.5832	0.28117	15.5265	0.2259	6.0567	0.06155	1.72049	1.30273	1.45493	1.01623
21/05/2018 4	0.12773	0.00339	20.2102	0.75398	14.4154	0.55817	5.79482	0.19877	2.65404	3.73068	3.87203	3.43013
20/11/17 3	0.12507	0.00221	15.7794	0.46215	11.1624	0.34269	4.61695	0.11958	1.76701	2.92882	3.07003	2.59002
21/05/2018 5	0.11324	0.00442	15.9382	0.68355	11.1485	0.40419	4.7897	0.28088	3.90321	4.28875	3.62551	5.86425
21/05/2018 8	0.10358	0.00265	16.0219	0.26024	11.1808	0.1201	4.84103	0.24245	2.55841	1.62428	1.07416	5.00823
21/05/2018 7	0.10343	0.00148	16.0921	0.91373	11.459	0.69969	4.6331	0.21557	1.43092	5.67813	6.10603	4.65282
22/05/2018 1	0.09137	0.00216	12.5636	1.7054	8.95008	0.36735	3.61348	0.05583	2.36401	13.5742	4.10443	1.54505
22/05/2018 2	0.08035	0.0025	11.1385	1.76116	7.913	0.17741	3.2255	0.03718	3.11139	15.8115	2.24201	1.15269
22/05/2018 3	0.07696	0.00188	10.706	0.42041	7.62033	0.42773	3.08563	0.07321	2.44283	3.92687	5.61301	2.37261
20/11/17 4	0.06714	0.00101	9.60001	0.20679	6.77247	0.13942	2.82755	0.06965	1.50432	2.15406	2.05863	2.46326
22/05/2018 4	0.06467	0.00208	8.1751	0.59308	5.81075	0.68466	2.36435	0.24749	3.21633	7.25471	11.7826	10.4676
20/11/17 5	0.06013	0.00132	9.66	0.10484	6.8082	0.10095	2.8518	0.00658	2.19524	1.0853	1.48277	0.230731
22/05/2018 5	0.05325	0.0019	6.8775	0.60632	4.93275	0.20332	1.94475	0.08347	3.56808	8.81599	4.12184	4.29207
22/05/2018 6	0.04766	0.000767167	5.3147	0.15661	3.82675	0.14551	1.48795	0.10407	1.60967	2.94673	3.80244	6.99419
13/11/17 11	0.03609	0.00133	5.38377	0.19654	3.70597	0.06614	1.67781	0.16753	3.68523	3.6506	1.78469	9.98504
20/11/17 6	0.03332	0.000526392	5.77257	0.15425	4.07587	0.10914	1.69671	0.04588	1.57981	2.67212	2.67771	2.70406
20/11/17 10	0.02917	0.00071687	3.683	0.15884	2.5843	0.12121	1.0987	0.04043	2.45756	4.31279	4.69024	3.6798
20/11/17 8	0.02813	0.00071687	5.30295	0.00236	3.69983	0.09033	1.60311	0.0509	2.54842	0.0445035	2.44146	3.17508
20/11/17 7	0.01891	0.000850249	3.7744	0.21265	2.651	0.12916	1.1234	0.08407	4.49629	5.63401	4.87212	7.48353
20/11/17 9	0.01702	0.000920908	3.04951	0.04922	2.13867	0.03599	0.91085	0.01864	5.41074	1.61403	1.68282	2.04644
20/11/17 12	0.01282	0.00201	0.98157	0.20866	0.66173	0.15165	0.31983	0.0572	15.6786	21.2578	22.9172	17.8845
20/11/17 13	0.00855	0.000808211	0.83018	0.1215	0.5593	0.08324	0.27088	0.04245	9.45276	14.6354	14.8829	15.6711
20/11/17 14	0.00372	0.00199	0.2079	0.06076	0.1431	0.05224	0.0648	0.00852	53.4946	29.2256	36.5059	13.1481
13/11/17 16	0.00245	0.00107	0.04609	0.04234	0.05547	0.03466	-0.00937	0.0105	43.6735	91.8637	62.4842	-112.06
20/11/17 15	0.00194	0.00119	0.18304	0.05254	0.08015	0.02005	0.10289	0.05158	61.3402	28.7041	25.0156	50.1312
20/11/17 16	0.000794508	0.000854896	0.07917	0.04397	0.04628	0.03647	0.03288	0.00824	107.601	55.5387	78.8029	25.0608
13/11/17 17	0.000602316	0.000574419	0.00734	0.03244	0.01225	0.02195	-0.00491	0.01049	95.3684	441.962	179.184	-213.646
								Average %RSD for linear interval =	3.44885	5.75132	4.74472	4.97852

## Sheet: Low Volume
Sample Name	Green Pixel Saturation (a.u.)	SD (green)	Chl a+b (µg/ml)	SD (Chl a +b)	Chl a (µg/ml)	SD (Chl a)	Chl b (µg/ml)	SD (Chl b)	%RSD (GPI)	%RSD(Chla+b)
16/04/18 11	0.10685	0.00205	14.5817	0.26007	10.4297	0.17786	4.15197	0.08468	1.91858	1.78354
20/11/17 19	0.10504	0.00252	13.3026	0.19069	9.38943	0.16247	3.91315	0.06033	2.39909	1.43348
16/04/18 10	0.09695	0.01011	15.078	1.04401	10.5713	0.67954	4.50669	0.38044	10.4281	6.92405
16/04/18 12	0.09268	0.0011	12.0951	0.48901	8.6404	0.40282	3.45472	0.08789	1.18688	4.04304
16/04/18 13	0.07655	0.00175	10.0688	0.77044	7.10427	0.51086	2.96459	0.26168	2.28609	7.65172
16/04/18 14	0.06775	0.000836906	8.18939	0.28938	5.81313	0.22637	2.37625	0.06527	1.23529	3.5336
20/11/17 20	0.06401	0.00147	9.27845	0.11447	6.57917	0.10739	2.69929	0.04065	2.29652	1.23372
16/04/18 15	0.0496	0.00175	6.34339	0.8912	4.53493	0.64794	1.80845	0.25326	3.52823	14.0493
20/11/17 21	0.04296	0.0014	6.443	0.07534	4.5295	0.0369	1.9135	0.05044	3.25885	1.16933
20/11/17 22	0.01633	0.00115	2.47601	0.04715	1.72877	0.04901	0.74725	0.01741	7.04225	1.90427
20/11/17 23	0.00525	0.00524	0.57619	0.00737	0.36073	0.04022	0.21545	0.03794	99.8095	1.27909
20/11/17 24	0.000215986	0.00115	0.01879	0.03249	-0.01157	0.02694	0.03035	0.02031	532.442	172.911

## Sheet: +1.5 mL E.coli
Sample Name	Green Pixel Saturation (a.u.)	SD (green)	Chl a+b (µg/ml)	SD (Chl a +b)	Chl a (µg/ml)	SD Chla	Chl b (µg/ml)	SD Chlb	%RSD (GPI)	%RSD(Chla+b)
08/02/18 3	0.12175	0.00304	15.8474	0.14119	11.0507	0.03701	4.79677	0.15308	2.49692	0.890933
08/02/18 1	0.11689	0.00216	14.7274	0.73486	10.1472	0.4551	4.58027	0.36128	1.84789	4.98974
08/02/18 2	0.1025	0.00416	12.0498	0.20665	8.09258	0.1105	3.95718	0.11201	4.05854	1.71497
08/02/18 4	0.05851	0.000645119	6.24017	0.40797	4.13733	0.11224	2.10283	0.30903	1.10258	6.5378
08/02/18 5	0.03035	0.00131	3.15181	0.04584	2.08407	0.01231	1.06775	0.04434	4.31631	1.4544
08/02/18 6	0.01868	0.00115	1.61427	0.05071	1.06313	0.04815	0.55113	0.00609	6.15632	3.14136
08/02/18 7	0.01003	0.0011	0.75654	0.0905	0.49005	0.03497	0.26649	0.05553	10.9671	11.9624
08/02/18 8	0.00599	0.000766327	0.32156	0.0952	0.1933	0.04757	0.12826	0.05002	12.7934	29.6057

## Sheet: +0.325 mL E.coli
Sample Name	Green Pixel Saturation (a.u.)	SD (green)	Chl a+b (µg/ml)	SD (Chl a +b)	Chl a (µg/ml)	SD Chla	Chl b (µg/ml)	SD Chlb	%RSD (GPI)	%RSD (Chla+b)
08/02/18 17	0.11465	0.00385	15.7148	0.15144	10.9367	0.14953	4.77817	0.09562	3.35805	0.963676
08/02/18 19	0.06333	0.00104	7.67943	0.1554	5.30542	0.19235	2.37402	0.06203	1.64219	2.02359
08/02/18 18	0.05321	0.00178	6.91027	0.15144	4.77283	0.14953	2.13743	0.09562	3.34524	2.19152
08/02/18 20	0.04018	0.000815233	4.73537	0.16244	3.28908	0.13469	1.44628	0.10157	2.02895	3.43035
08/02/18 21	0.02971	0.00105	3.36476	0.03581	2.3107	0.04909	1.05406	0.03059	3.53416	1.06427
08/02/18 22	0.01043	0.000852521	0.49741	0.09532	0.33657	0.06342	0.16085	0.03646	8.17374	19.1633
08/02/18 23	0.00816	0.000868393	0.78487	0.05053	0.54807	0.03555	0.23681	0.01574	10.6421	6.43801
08/02/18 24	0.00264	0.00114	0.10955	0.00524	0.08627	0.02796	0.02329	0.03026	43.1818	4.7832

## Sheet: High pH
Sample Name	Green Pixel Saturation (a.u.)	SD (green)	Chl a+b (µg/ml)	SD (Chl a +b)	Chl a (µg/ml)	SD (Chl a)	Chl b (µg/ml)	SD (Chl b)	%RSD (GPI)	%RSD (Chla+b)
20/02/18 3	0.1272	0.00231	15.8061	0.30546	10.928	0.14406	4.87808	0.1879	1.81604	1.93255
20/02/18 4	0.10521	0.00124	14.4245	0.24258	9.86693	0.06512	4.55757	0.23463	1.1786	1.68172
20/02/18 5	0.08282	0.00222	11.6516	0.46738	7.72847	0.33603	3.92311	0.13545	2.68051	4.0113
20/02/18 6	0.07162	0.00105	9.46112	0.31217	6.3046	0.11699	3.15652	0.20725	1.46607	3.2995
20/02/18 7	0.04866	0.000243361	6.32888	0.27271	4.2532	0.12182	2.07568	0.16043	0.500125	4.30898
20/02/18 8	0.033	0.00139	4.63916	0.18725	3.0856	0.05318	1.55356	0.13507	4.21212	4.03629
20/02/18 9	0.02232	0.000429383	3.39381	0.21724	2.20897	0.09456	1.18485	0.12273	1.92376	6.40107
20/02/18 10	0.01135	0.000689213	2.01294	0.08378	1.32075	0.04924	0.69219	0.03809	6.07236	4.16207
20/02/18 11	0.00578	0.000672043	0.95773	0.05286	0.58977	0.0268	0.36797	0.0333	11.627	5.5193
20/02/18 12	0.00121	0.000734968	0.47011	0.04152	0.26953	0.01461	0.20057	0.0282	60.7412	8.83198

## Sheet: TAP-N
Sample Name	Green Pixel Saturation (a.u.)	SD (green)	Chl a+b (µg/ml)	SD (Chl a +b)	Chl a (µg/ml)	SD (Chl a)	Chl b (µg/ml)	SD (Chl b)	%RSD (GPI)	%RSD (Chla+b)
02/12/17 N11	0.10994	0.0011	11.1598	0.53235	8.1095	0.34102	3.0503	0.22017	1.00055	4.77025
28/02/18 2	0.08277	0.0012	11.2058	0.13807	7.757	0.14217	3.44876	0.0727	1.4498	1.23213
04/12/17 N10	0.06423	0.000358037	3.77929	0.05162	2.65917	0.02585	1.12013	0.04239	0.55743	1.36587
01/03/18 2	0.06326	0.00173	7.75056	0.24635	5.1666	0.1813	2.58396	0.125	2.73475	3.17848
02/03/18 2	0.05824	0.00228	5.9898	0.09782	4.0092	0.02564	1.9806	0.10605	3.91484	1.63311
03/03/18 2	0.04999	0.000894484	4.51381	0.21366	3.11247	0.19569	1.40135	0.02321	1.78933	4.73347
05/03/18 2	0.04949	0.00144	3.55088	0.04101	2.3638	0.00589	1.18708	0.0469	2.90968	1.15492
04/03/18 2	0.04946	0.00146	4.03929	0.08523	2.72827	0.05616	1.31103	0.04691	2.95188	2.11002
30/11/17 N9	0.04501	0.00181	4.83253	0.16391	3.27957	0.12416	1.55297	0.06273	4.02133	3.39181
07/03/18 2	0.04075	0.000979653	2.34057	0.06543	1.58857	0.04612	0.75201	0.02173	2.40406	2.79547
06/03 18 2	0.0405	0.00185	2.72985	0.10493	1.85197	0.06656	0.87789	0.04314	4.5679	3.8438
02/12/17 N8	0.03542	0.00198	2.8102	0.03986	1.9646	0.04104	0.8456	0.02099	5.59006	1.4184
04/12/17 N7	0.03282	0.00107	1.81522	0.18578	1.2161	0.06075	0.59912	0.1259	3.26021	10.2346
02/03/18 1	0.02193	0.00201	2.34807	0.05322	1.67618	0.04663	0.67188	0.02063	9.16553	2.26654
03/03/18 1	0.02003	0.00131	1.02663	0.1433	0.72622	0.10517	0.30042	0.03819	6.54019	13.9583
01/03/18 1	0.01896	0.00106	2.59354	0.07294	1.79615	0.05617	0.79739	0.01989	5.59072	2.81237
04/03/18 1	0.01732	0.00137	1.45569	0.02818	1.02382	0.02948	0.43188	0.00493	7.90993	1.93585
05/03/18 1	0.01719	0.0008572	0.97707	0.01291	0.67568	0.00646	0.30138	0.0106	4.98662	1.3213
30/11/17 N6	0.01523	0.000939445	1.49161	0.08312	1.04083	0.05371	0.45077	0.02969	6.16838	5.5725
04/12/17 N4	0.01399	0.000407677	0.85875	0.0349	0.56407	0.04611	0.29469	0.02566	2.91406	4.06405
07/03/18 1	0.01395	0.00108	0.39907	0.04067	0.27973	0.03701	0.11933	0.00795	7.74194	10.1912
28/02/18 1	0.01384	0.00022641	1.91514	0.00734	1.3614	0.01225	0.55374	0.00491	1.63591	0.383262
06/03/18 1	0.01381	0.00148	0.59371	0.01826	0.41143	0.00752	0.18227	0.02051	10.7169	3.07558
02/12/17 N5	0.01113	0.00266	1.03745	0.03904	0.73353	0.03743	0.30391	0.01277	23.8994	3.76307
30/11/17 N3	0.00939	0.000646803	0.70429	0.09578	0.48868	0.07976	0.2156	0.01857	6.88821	13.5995
02/12/17 N2	0.00646	0.000723245	0.56024	0.02297	0.3985	0.01975	0.16174	0.00322	11.1957	4.10003
04/12/17 N1	0.00571	0.000298111	0.11303	0.29164	0.08133	0.1695	0.03169	0.12269	5.22086	258.02
